# Supplementary material for: Biodiversity and Physiological Characteristics of Novel Faecalibacterium prausnitzii Strains Isolated from Human Feces
Source: MDPI journal article supplement (doi:10.3390/microorganisms10020297), 2022-01-26
Supplement: s1 [file s1]

# Supplementary data

**Table S1.** Minimum inhibitory concentrations (MIC) (µg/mL) of tested antibiotics for each of the *F. prausnitzii* isolates and reference strain A2-165.

| Strains   | TRI  | CIP  | AMP      | VAN      | KAN      | GEN    | STR    | TET       | CLI      | ERY      | CHL       | NEO |
|-----------|------|------|----------|----------|----------|--------|--------|-----------|----------|----------|-----------|-----|
|           | ND   | ND   | 1        | 4        | 16       | 4      | 8      | 2         | 4        | 1        | 4         | ND  |
| A2-165    | 32   | 4    | 1(S)     | 0.5(S)   | 128(R)   | 32(R)  | 16(R)  | 0.25(S)   | 0.5(S)   | 0.5(S)   | 0.5(S)    | 16  |
| FJNHS1Y51 | 1    | 0.25 | 4(R)     | 0.5(S)   | 64(R)    | 16(R)  | 8(S)   | 0.5(S)    | 4(S)     | 2(R)     | 8(R)      | 8   |
| FJNHW1Y09 | 64   | 8    | 0.5(S)   | <0.25(S) | 8(S)     | 2(S)   | 0.5(S) | 0.25(S)   | <0.03(S) | 8(R)     | 2(S)      | 8   |
| FJNHW1Y29 | 32   | 4    | 0.25(S)  | 0.5(S)   | 16(S)    | 4(S)   | 0.5(S) | 0.25(S)   | <0.03(S) | 0.25(S)  | 1(S)      | 8   |
| FJNZ1Y10  | 64   | 4    | 0.5(S)   | <0.25(S) | 32(R)    | 16(R)  | 4(S)   | 0.25(S)   | <0.03(S) | 1(S)     | <0.125(S) | 16  |
| FJNZ1Y25  | 64   | 4    | 0.5(S)   | <0.25(S) | 32(R)    | 16(R)  | 4(S)   | <0.125(S) | <0.03(S) | 1(S)     | <0.125(S) | 16  |
| FJNZ1Y27  | 64   | 4    | 0.5(S)   | <0.25(S) | 32(R)    | 16(R)  | 4(S)   | <0.125(S) | <0.03(S) | 1(S)     | 16(R)     | 16  |
| FJNZ1Y40  | 64   | 4    | 1(S)     | <0.25(S) | 32(R)    | 16(R)  | 4(S)   | 0.25(S)   | <0.03(S) | 1(S)     | <0.125(S) | 16  |
| FJNLA1Y02 | 0.25 | 2    | 1(S)     | <0.25(S) | 32(R)    | 16(R)  | 8(S)   | <0.125(S) | 4(S)     | 1(S)     | 2(S)      | 16  |
| FJNLA1Y08 | 64   | 0.5  | 0.5(S)   | 2(S)     | >1024(R) | 256(R) | 8(S)   | 32(R)     | 2(S)     | 0.125(S) | 8(R)      | 128 |
| FJNLA1Y11 | 1    | 4    | 2(R)     | 1(S)     | 32(R)    | 16(R)  | 8(S)   | <0.125(S) | 4(S)     | 1(S)     | 1(S)      | 8   |
| FJNLA1Y27 | 64   | 8    | 1(S)     | <0.25(S) | 16(S)    | 4(S)   | 8(S)   | <0.125(S) | 0.5(S)   | 8(R)     | 16(R)     | 4   |
| FJNLA1Y29 | 64   | 4    | 0.5(S)   | <0.25(S) | 32(R)    | 16(R)  | 2(S)   | <0.125(S) | <0.03(S) | 2(R)     | <0.125(S) | 8   |
| FJNLA1Y38 | 16   | 2    | 2(R)     | 0.5(S)   | 512(R)   | 32(R)  | 4(S)   | 0.25(S)   | 4(S)     | 1(S)     | 16(R)     | 8   |
| FJNLB1Y08 | 32   | 4    | 0.5(S)   | <0.25(S) | 32(R)    | 4(S)   | 1(S)   | 0.25(S)   | 0.25(S)  | 0.125(S) | 0.5(S)    | 4   |
| FJNLB1Y11 | 64   | 2    | 4(R)     | <0.25(S) | 512(R)   | 128(R) | 8(S)   | 1(S)      | 1(S)     | 2(R)     | 2(S)      | 128 |
| FJNLB1Y16 | 64   | 8    | 4(R)     | <0.25(S) | 64(R)    | 16(R)  | 4(S)   | <0.125(S) | <0.03(S) | 8(R)     | 0.25(S)   | 16  |
| FJNLB1Y25 | 64   | 2    | 0.5(S)   | 0.5(S)   | 64(R)    | 8(R)   | 8(S)   | 0.25(S)   | 0.125(S) | 0.25(S)  | 4(S)      | 8   |
| FJNLB1Y49 | 64   | 4    | 1(S)     | <0.25(S) | 64(R)    | 16(R)  | 8(S)   | 0.25(S)   | 0.25(S)  | 0.5(S)   | 2(S)      | 8   |
| FJNPY1Y39 | 64   | 4    | 0.5(S)   | <0.25(S) | 128(R)   | 64(R)  | 8(S)   | 0.25(S)   | 0.06(S)  | 0.5(S)   | 0.5(S)    | 8   |
| FJNQL1Y13 | 64   | 0.5  | 0.125(S) | 2(S)     | 512(R)   | 256(R) | 128(R) | 32(R)     | 16(R)    | 8(R)     | 8(R)      | 128 |
| FJNQL1Y33 | 64   | 1    | 16(R)    | 1(S)     | 64(R)    | 32(R)  | 8(S)   | 4(R)      | 0.5(S)   | 0.125(S) | 2(S)      | 16  |
| FJNSM1Y10 | 64   | 8    | 1(S)     | <0.25(S) | 16(S)    | 4(S)   | 2(S)   | 0.5(S)    | <0.03(S) | 8(R)     | 0.5(S)    | 4   |
| FJNSM1Y12 | 64   | 4    | 1(S)     | <0.25(S) | 32(R)    | 8(R)   | 8(S)   | 0.25(S)   | 4(S)     | 8(R)     | 1(S)      | 8   |
| FJNXY1Y35 | 64   | 16   | 0.5(S)   | 0.5(S)   | >1024(R) | 256(R) | 2(S)   | 0.5(S)    | 16(R)    | 8(R)     | 2(S)      | 32  |
| FJNZF1Y21 | 64   | 4    | 0.5(S)   | <0.25(S) | >1024(R) | 32(R)  | 4(S)   | 32(R)     | <0.03(S) | 1(S)     | 0.5(S)    | 16  |
| FJNZF1Y25 | 64   | 16   | 0.5(S)   | 0.5(S)   | >1024(R) | 256(R) | 2(S)   | 0.5(S)    | 0.25(S)  | 8(R)     | 1(S)      | 8   |

Notes: TRI, trimethoprim; CIP, ciprofloxacin; AMP, ampicillin; VAN, vancomycin; KAN, kanamycin; GEN, gentamicin; STR, streptomycin; TET, tetracycline; CLI, clindamycin; ERY, erythromycin; CHL, chloramphenicol; NEO, neomycin. Numbers in bold represent the breakpoint (BP) based on Gram+ bacterium from EFSA. R, resistance (> BP). S, sensitivity (≤ BP). ND, not defined.
